# Supplementary material for: A pH-responsive assembly based on upconversion nanocrystals and ultrasmall nickel nanoparticles
Source: Royal Society of Chemistry journal article supplement (doi:10.1039/c7tc02665j), 2017-01-01
Supplement: c7tc02665j1.pdf [file c7tc02665j1.pdf]

## Supporting Information

### **A pH Responsive Assembly based on Upconversion Nanocrystal and Ultrasmall Nickel Nanoparticles**

Xia Xu,<sup>a,b</sup> Yan Long,<sup>a,b</sup> Pengpeng Lei,<sup>a,b</sup> Lile Dong,<sup>a,c</sup> Kaimin Du,<sup>a,c</sup> Jing Feng\*<sup>a</sup> and Hongjie  
Zhang\*<sup>a</sup>

<sup>a</sup> State Key Laboratory of Rare Earth Resource Utilization, Changchun Institute of Applied  
Chemistry, Chinese Academy of Science, 5625 Renmin Street, Changchun 130022, China.

\*E-mail: fengj@ciac.ac.cn; hongjie@ciac.ac.cn

<sup>b</sup> University of Chinese Academy of Sciences, Beijing 100049, China

<sup>c</sup> University of Science and Technology of China, Hefei 230026, China

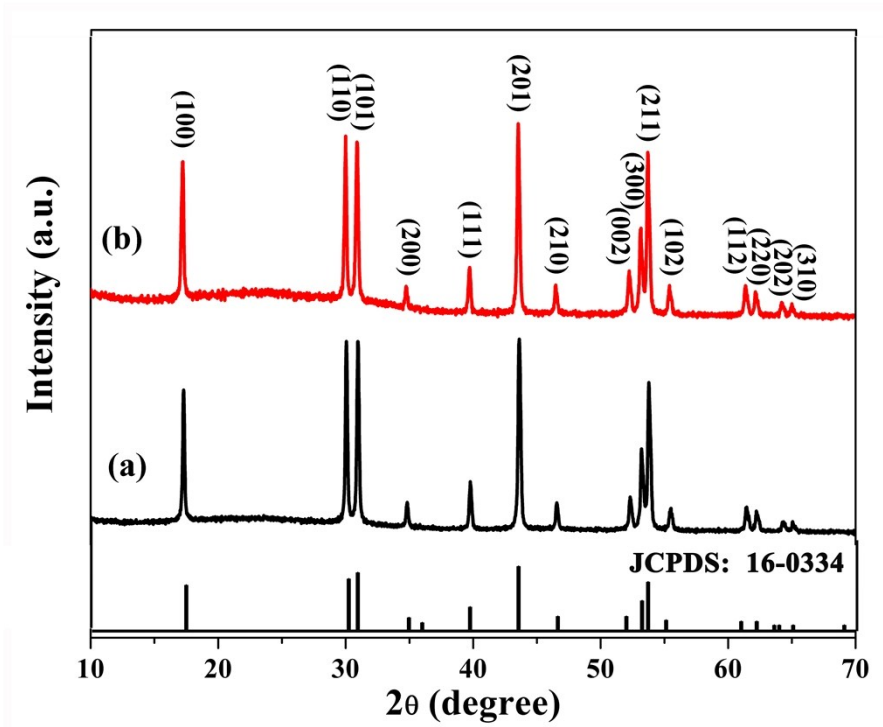

**Fig. S1** XRD patterns of (a) NaYF<sub>4</sub>:Yb<sup>3+</sup>/Er<sup>3+</sup> core nanoparticles and (b) NaYF<sub>4</sub>:Yb<sup>3+</sup>/Er<sup>3+</sup>@NaYF<sub>4</sub> core@shell nanoparticles.

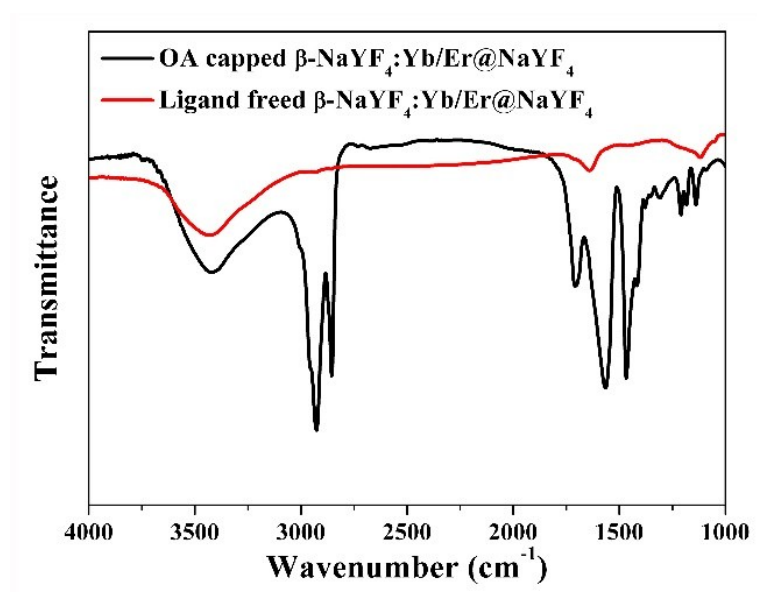

**Fig. S2** Corresponding FT-IR spectra of oleic acid-capped (black line) and ligand free (red line) NaYF<sub>4</sub>:Yb<sup>3+</sup>/Er<sup>3+</sup>@NaYF<sub>4</sub> core@shell nanoparticles.

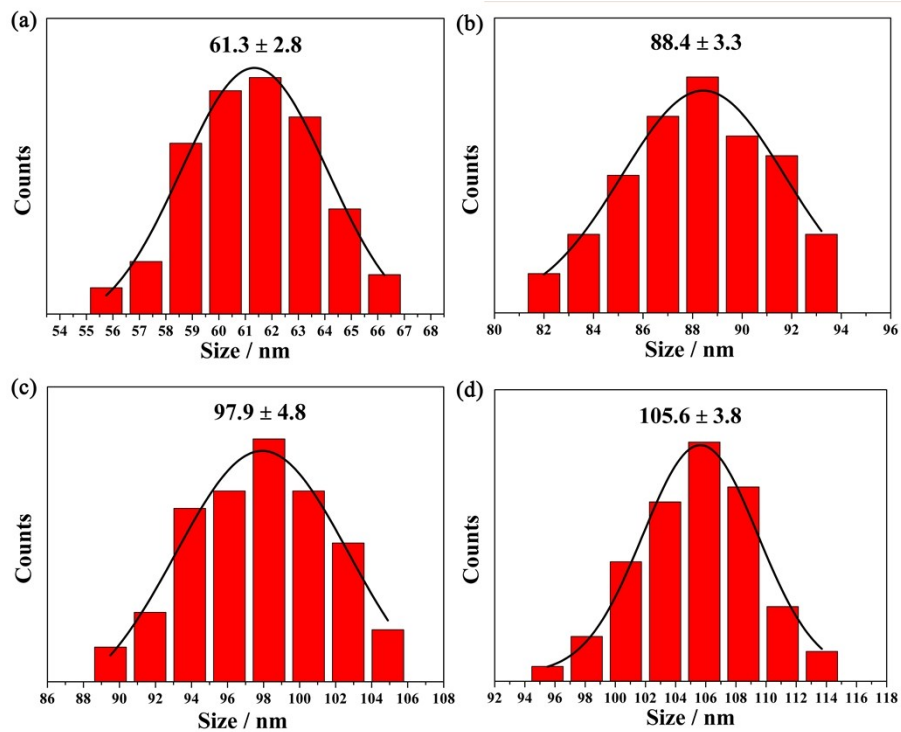

**Fig. S3** The size distributions of the prepared particles: (a)  $\text{NaYF}_4:\text{Yb}^{3+}/\text{Er}^{3+}$  core nanoparticles, (b)  $\text{NaYF}_4:\text{Yb}^{3+}/\text{Er}^{3+}@\text{NaYF}_4$  core@shell nanoparticles, (c) core@shell@Ni and (d) core@shell@Ni(OH)<sub>2</sub>.

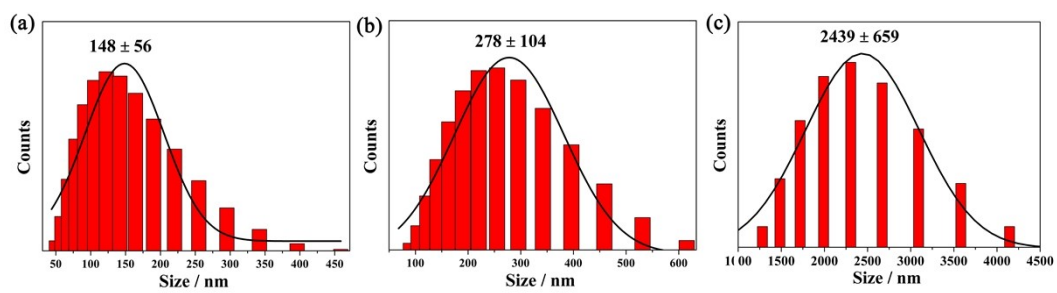

**Fig. S4** The dynamic light scattering size distribution of the hydrophilic particles: (a)  $\text{NaYF}_4:\text{Yb}^{3+}/\text{Er}^{3+}@\text{NaYF}_4$  core@shell nanoparticles, (b) core@shell@Ni and (c) core@shell@Ni(OH)<sub>2</sub>.

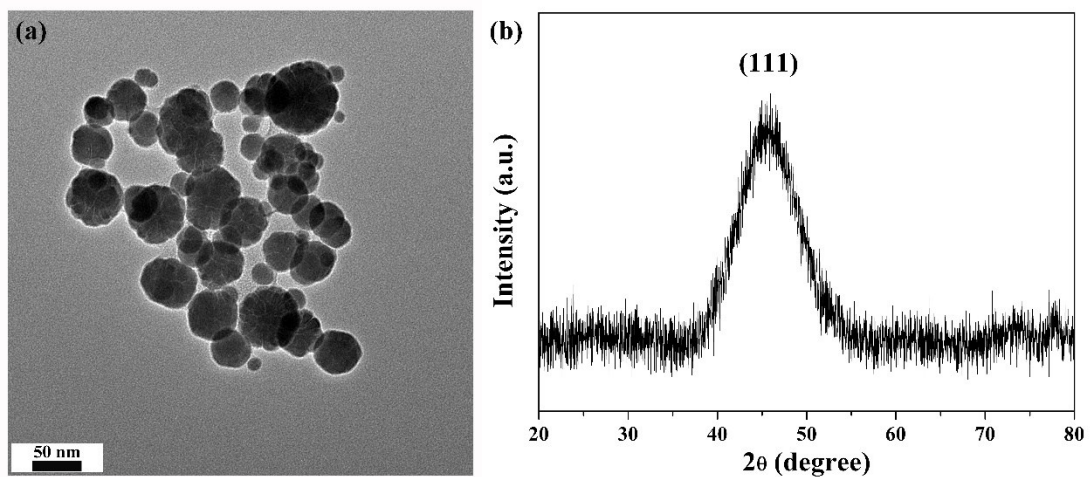

**Fig. S5** (a) TEM image and (b) XRD pattern of Ni-B nanoparticles.

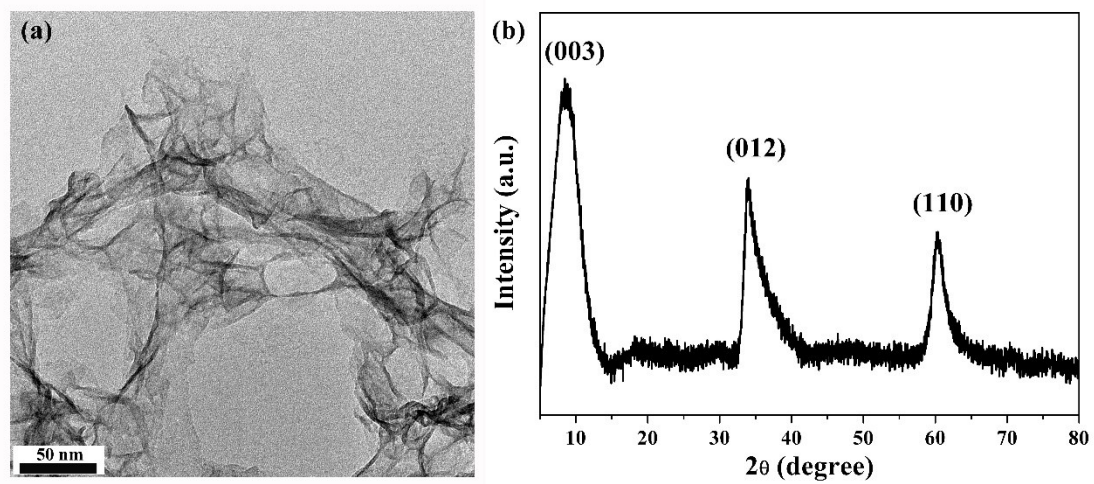

**Fig. S6** (a) TEM image and (b) XRD pattern of  $\text{Ni}(\text{OH})_2$  nanosheets.

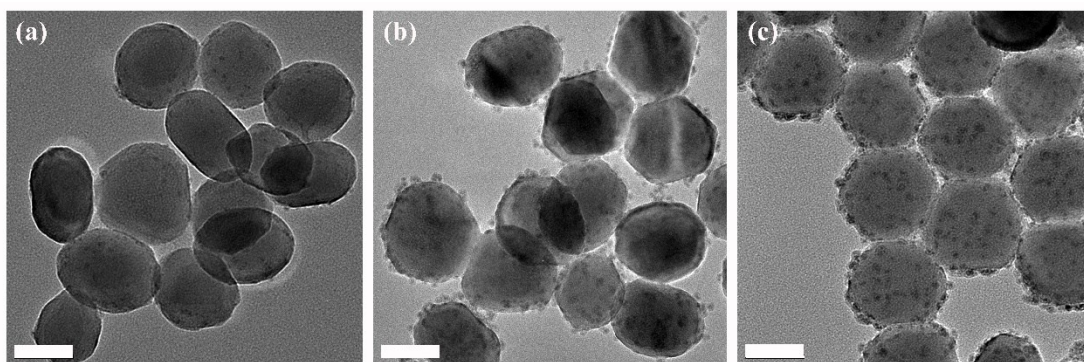

**Fig. S7** TEM images of the core@shell@Ni assemblies produced from the molar ratio of Ni nanoparticle to core@shell UCNPs of (a) 0.07:1, (b) 0.14:1 and (c) 0.28:1. Scale bar = 50 nm.

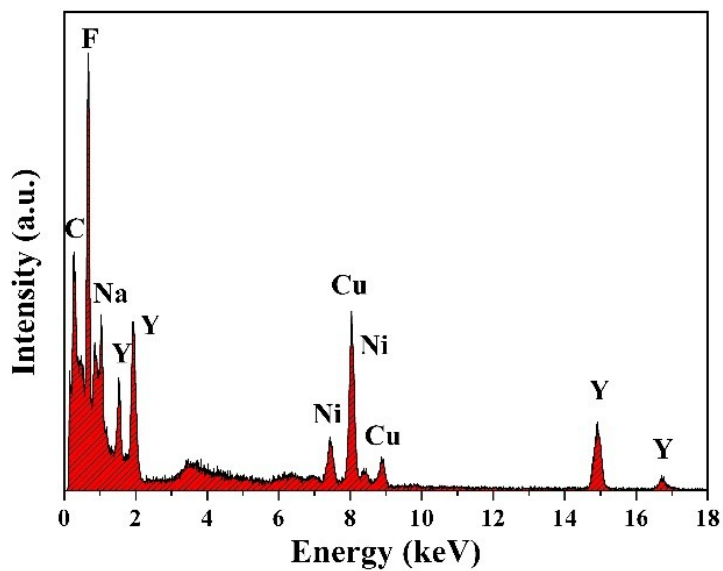



**Fig. S8** Energy dispersive X-ray spectroscopy (EDS) spectrum of Ni-modified NaYF<sub>4</sub>:Yb<sup>3+</sup>/Er<sup>3+</sup>@NaYF<sub>4</sub> UCNPs, indicating the presence of elemental Na, Y, F and Ni. Note that the strong signal of Cu comes from the copper TEM grid.

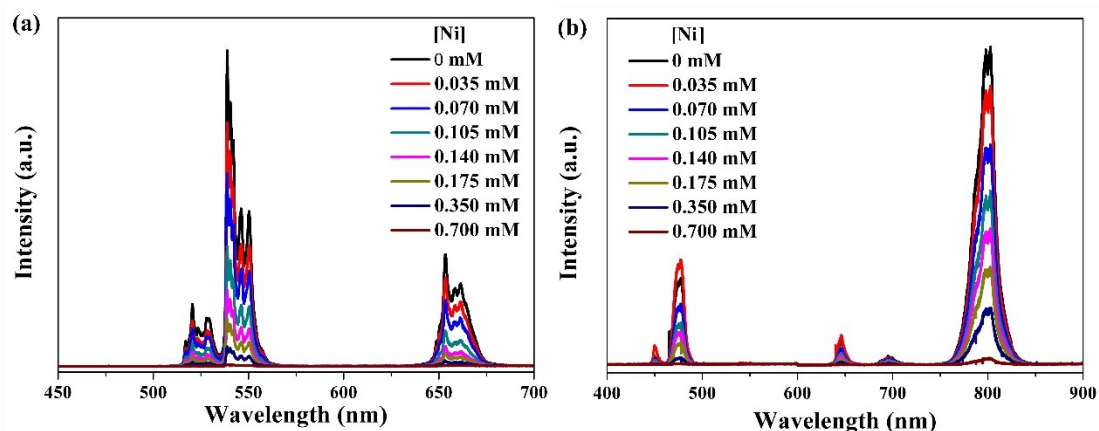

**Fig. S9** Upconversion emission spectra of (a)  $\text{Er}^{3+}$  and (b)  $\text{Tm}^{3+}$  ions doped  $\text{NaYF}_4:\text{Yb}^{3+}@\text{NaYF}_4$  UCNPs modified with Ni nanoparticles at different concentrations. The concentrations of lanthanide ions are fixed at 2.5 mM. All the spectra were characterized in ethanol solution. The power density is  $0.3 \text{ W mm}^{-2}$ .

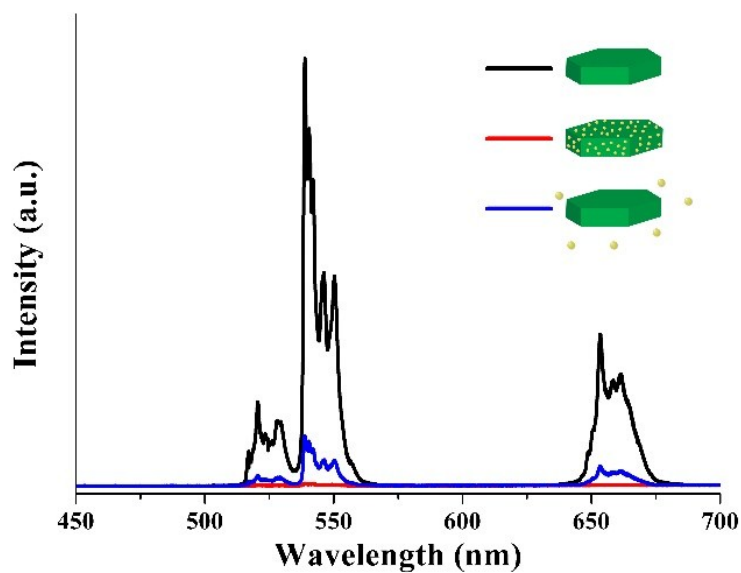

**Fig. S10** Upconversion emission spectra taken for NaYF<sub>4</sub>:Yb<sup>3+</sup>/Er<sup>3+</sup>@NaYF<sub>4</sub> core@shell UCNPs with different routes of surface modification: no modification, hetero-assembling Ni nanoparticle and core@shell UCNPs and physical mixing of pre - formed Ni-B nanoparticle and the UCNPs. The power density is 0.3 W mm<sup>-2</sup>.

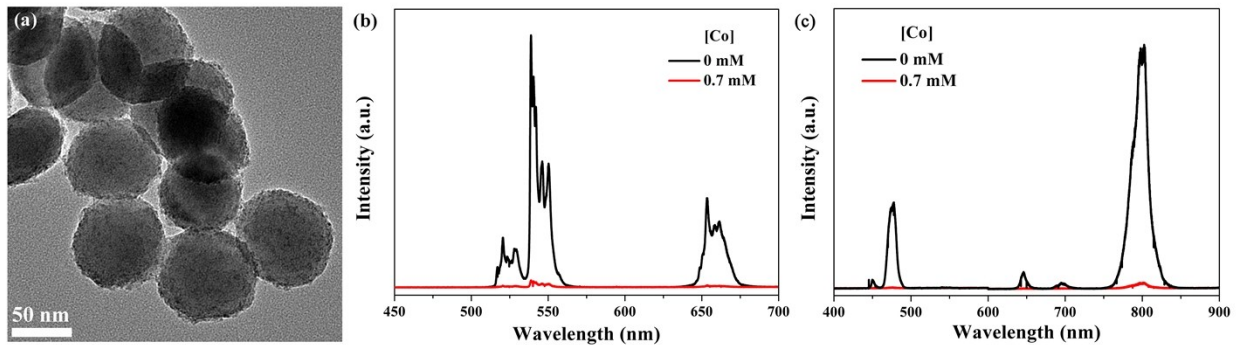

**Fig. S11** (a) TEM image of Co-modified core@shell UCNPs, upconversion emission spectra of (b) Er<sup>3+</sup>-doped and (c) Tm<sup>3+</sup>-doped core@shell nanoparticles (black line) and Co nanoparticle-modified core@shell nanoparticles (red lines) with a UCNPs/Co molar ratio of 1:0.28, the concentrations of lanthanide ions are fixed at 2.5 mM. The power density is 0.3 W mm<sup>-2</sup>.

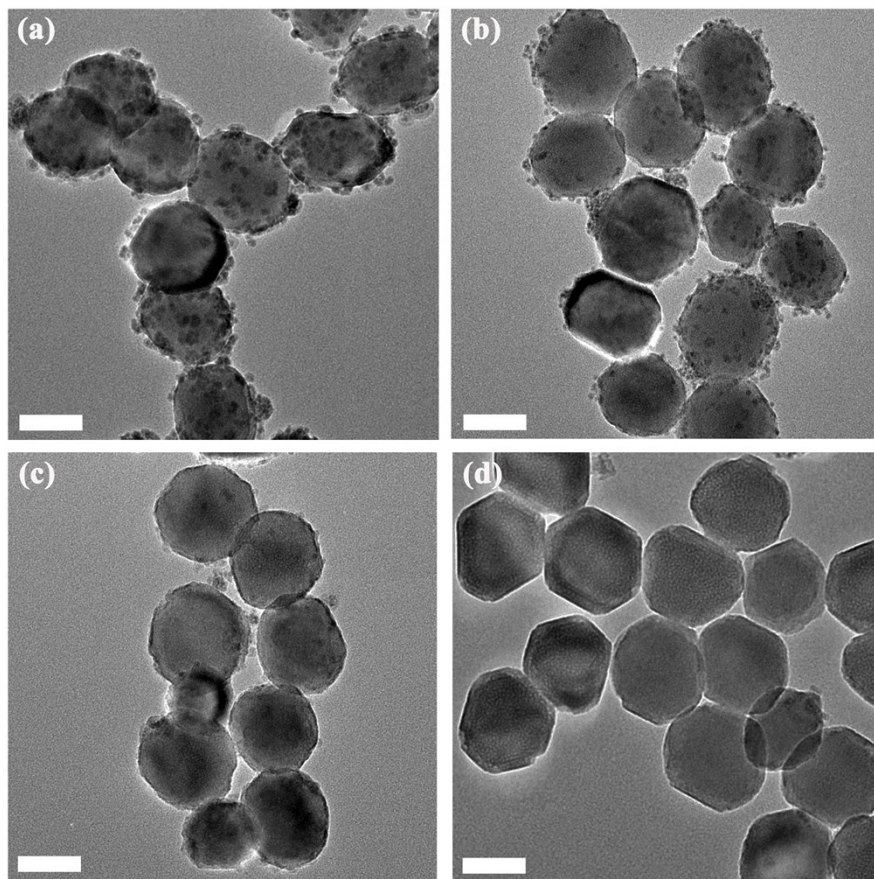

**Fig. S12** TEM images of core@shell@Ni nanoparticles responding to pH 5.0 PBS with different reaction times (0, 3, 6 and 9 min). Scale bar = 50 nm.

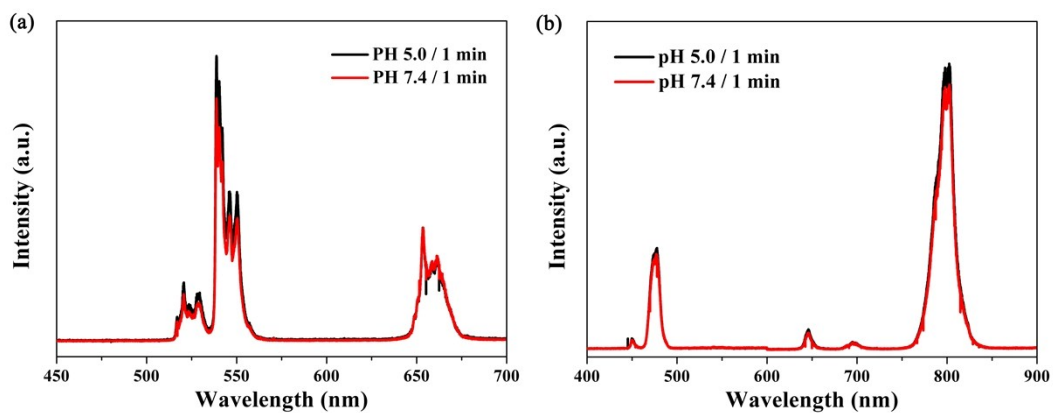

**Fig. S13** Upconversion luminescence response of Co-modified (a)  $\text{NaYF}_4:\text{Yb}^{3+}/\text{Er}^{3+}@\text{NaYF}_4$  and (b)  $\text{NaYF}_4:\text{Yb}^{3+}/\text{Tm}^{3+}@\text{NaYF}_4$  nanoparticles with a UCNPs/Co molar ratio of 1:0.28 (the concentrations of lanthanide ions are fixed at 2.5 mM) against different pH PBS solution at 1 min.
